# Supplementary material
Source: publisher figshare collection journal article supplement (https://acs.figshare.com/ndownloader/files/11321456)
Supplement: Supplementary file 1 [file 11321456]

# Supporting Information

## Determination of defect levels in melt-grown all-inorganic perovskite CsPbBr<sub>3</sub> crystals by thermally stimulated current spectra

*Mingzhi Zhang <sup>a</sup>, Zhiping Zheng <sup>\*a</sup>, Qiuyun Fu <sup>a</sup>, Pengju Guo <sup>a</sup>, Sen Zhang <sup>a</sup>, Cheng Chen <sup>a</sup>,  
Hualin Chen <sup>a</sup>, Mei Wang <sup>a</sup>, Wei Luo <sup>a</sup>, Yahui Tian <sup>a</sup>*

*<sup>a</sup> School of Optical and Electronic Information, Engineering Research Center for Functional  
Ceramics of the Ministry of Education, Huazhong University of Science and Technology, Wuhan  
430074, P. R. China*

Full affiliation address: No. 1037, Luoyu Road, Hongshan District, Wuhan, Hubei Province, P. R.  
China, 430074

### **Corresponding Author**

\* Zhiping Zheng

Email: zzp@mail.hust.edu.cn

Tel: +86-27-87545167

Fax: +86-27-87545167

## Contents

Section 1. Crystal growth, crystal cutting, and wafer treatment

Section 2. Theoretical formula analysis of TSC measurement and SIMPA method

Section 3. Calculation of carrier mobility lifetime product ( $\mu\tau$ ) of melt-grown CsPbBr<sub>3</sub> crystals

Section 4. Defect-related fitting parameters of TSC spectra

## Section 1. Crystal growth, crystal cutting, and wafer treatment

The growth of  $\text{CsPbBr}_3$  single crystal ingots was conducted in a self-designed vertical two-zone tube furnace by a creative electronic dynamic gradient (EDG) method.<sup>1</sup> The melt-grown crystals had a size of over 60 mm in length with a middle isometric ( $\phi 8$  mm) part of 40 mm. Wafers of around 2.5 mm thick were sliced along the radial direction from the isometric part using a 0.2 mm diamond wire saw.

Then the wafers were treated by a series of surface treatments to remove the physical damage and flatten the wafer surface.  $\text{Si}_3\text{N}_4$  abrasives with 14  $\mu\text{m}$  in diameter and then 7, 1.5 and 0.5  $\mu\text{m}$  were used to polish the surfaces of the wafers in turns. After that, the polished wafers were immersed in a concentration of 5% bromine methanol solution for 30 s to remove the physical damage of the surface caused by the cutting and mechanical polishing processes. Wafers with bright, shiny and mirror-like surfaces were obtained.

## Section 2. Theoretical formula analysis of TSC measurement and SIMPA method

The transition levels for different charged defect states were calculated using HSE+SPC by Jun Kang and Lin-Wang Wang, and the results were shown in [Figure S1](#).<sup>2</sup>

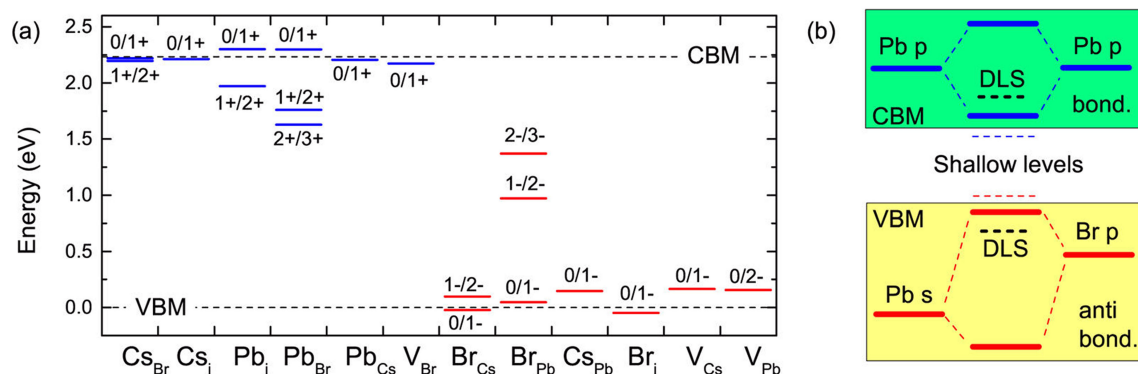

**Figure S1.** (a) Defect charge-transition levels calculated by HSE+SOC; (b) Illustration of the formation of shallow levels. Reprinted with permission from High Defect Tolerance in Lead Halide Perovskite CsPbBr<sub>3</sub>.

Copyright 2017, American Chemical Society.

In semiconductor materials, the kinetic equation of the concentration of electron ( $n_i$ ) in deep level vs. time ( $t$ ) can be expressed as [Equation \(1\)](#):<sup>3</sup>

$$\frac{dn_i}{dt} = -n_i N_C \sigma_i v_n \exp\left(-\frac{\Delta E_i}{k_0 T}\right) + n(N_i - n_i) \sigma_i v_n \quad (1)$$

Where,  $N_i$  is the concentration of the  $i$ th electronic defect,  $n_i$  is the concentration of electron occupied by the  $i$ th electronic defect,  $n$  is the concentration of electron in conduction band,  $\Delta E_i$  is the defect level,  $\sigma_i$  is the capture cross section of the  $i$ th defect,  $v_n$  is the thermal velocity,  $N_C$  is the effective state density of electron,  $k_0$  is the Boltzmann constant,  $T$  is the absolute temperature, and  $\tau$  is the average carrier lifetime. In fact, most of thermal motivated carriers are captured by all kinds of recombination centers and only a small number of carriers can be re-captured by trapping centers, this means  $\sigma_i \cdot v_n \ll 1/\tau$ , then we get the [Equation \(2\)](#):

$$\frac{\Delta E_i}{k_0 T_m} = \ln\left(\frac{T_m^2}{\beta}\right) + \ln\left(\frac{N_C \sigma_i v_n k_0}{\Delta E_i}\right) \quad (2)$$

Where,  $T_m$  is peak temperature of TSC current,  $\beta$  is the heating rate of the TSC measurement. As the effective state density of electron ( $N_C$ ) being inversely proportional to the square of temperature ( $N_C \propto T^{-2}$ ), the Equation (2) can be also expressed as Equation (3):

$$\ln\left(\frac{T_m^4}{\beta}\right) = \frac{\Delta E_i}{k_0 T_m} - \ln\left(\frac{N_C \sigma_i v_n k_0}{\Delta E_i T^2}\right) \quad (3)$$

The capture cross section ( $\sigma_i$ ) is usually very small in high resistance semiconductor single crystals, then the effect of the last expression in Equation (3) can be ignored, that is:

$$\Delta E_i = k_0 T_m \ln\left(\frac{T_m^4}{\beta}\right) \quad (4)$$

In the SIMPA fitting method, the temperature ( $T$ ) dependence of TSC current,  $I_{SIMPA}(T)$ , comprising the sum of TSC peaks belonging to the specific levels and the dark current  $I_{DC}(T)$ , is defined by:

$$I_{SIMPA}(T) = \sum_{i=1}^m I_{TSC}^i(T) + I_{DC}(T) \quad (5)$$

Where,  $I_{TSC}^i(T)$  is the  $i$ th individual TSC current peak,  $m$  is the number of defects involved in calculation. In the “first-order kinetics” approximation, the temperature ( $T$ ) dependent TSC current  $I_{TSC}^i(T)$  of a certain peak can be described as a specialized one:

$$I_{TSC}^i(T) = N_{T_i} e \mu_n A E \tau_n D_{i,i} T^2 \exp\left\{-\frac{E_{T_i}}{k_0 T} - \frac{k_0 D_{i,i} T^4}{\beta E_{T_i}} \exp\left(-\frac{E_{T_i}}{k_0 T}\right) \left[1 - 4\left(\frac{k_0 T}{E_{T_i}}\right) + 20\left(\frac{k_0 T}{E_{T_i}}\right)^2\right]\right\} \quad (6)$$

Where,  $N_T$  is the defect density at the beginning of temperature rising,  $e$  is the electron charge,  $\mu$  is the carrier mobility,  $\tau$  is the carrier lifetime,  $A$  is the area of electrode,  $E$  is the applied electric field,  $D_i$  is the defect dependent coefficient,  $T$  is the absolute temperature,  $E_T$  is the thermal activation energy of the  $i$ th defect which is related to the TSC peak position,  $k_0$  is the Boltzmann constant, and  $\beta$  is the heating rate of the TSC measurement. In addition,  $K_G = e A E$  denotes a

geometrical factor. The defect-dependent coefficient  $D_i$  has a relationship with the capture cross section  $\sigma_i$ , which can be expressed as:

$$D_i = 3.0 \times 10^{21} \left( \frac{m^*}{m_0} \right) \sigma_i \quad (7)$$

Where,  $m_0$  is the rest mass of carries and  $m^*$  is the effective mass of carries which is calculated to be  $0.23 m_0$  for both holes and electrons at room temperature.

The  $i$ th effective collecting charge ( $Q_{Ti}$ ) can be acquired from the SIMPA method.  $Q_{Ti}$  is time integral of the  $i$ th TSC current, and the expression can be described as:

$$Q_{Ti} = \int I_{TSC}^i dt = \frac{1}{\beta} \int_{T_0}^T I_{TSC}^i dT \leftarrow (dT = \beta dt) \quad (8)$$

Then the concentration ( $N_{Ti}$ ) of the  $i$ th defect can be calculated by the [Equation \(9\)](#):

$$N_{Ti} = \frac{Q_{Ti}}{V_{eff} \times e \times G} \quad (9)$$

Where,  $V_{eff}$  ( $V_{eff} = AL$ ) is the effective irradiation volume of the wafer, and  $G$  is the collecting efficiency which can be defined as:

$$G = \frac{\mu\tau V}{L^2} \quad (10)$$

Where,  $L$  is the distance of two Au electrodes, and  $V$  is the bias voltage.

Furthermore, a correction factor ( $f=1/2$ ) is attached to the  $i$ th TSC current because of the uniform distribution of defects in the wafer. Then the concentration ( $N_{Ti}$ ) of the  $i$ th defect can be expressed as:

$$N_{Ti} = \frac{Q_{Ti}}{2\mu\tau e A E} \quad (11)$$

### Section 3. Calculation of carrier mobility lifetime product ( $\mu\tau$ ) of melt-grown CsPbBr<sub>3</sub> crystals

In order to calculate the approximate concentration of intrinsic point defects in our melt-grown CsPbBr<sub>3</sub> crystals, the carrier mobility lifetime product ( $\mu\tau$ ) are required.

Photocurrent measurements were conducted using Agilent B1500A equipped with a 325 nm pulsed laser. The measurements were carried out on CsPbBr<sub>3</sub> devices with a structure of Au/CsPbBr<sub>3</sub>/Au. A modified Hecht equation (Equation (12)) was used to fit the obtained result, deriving the information of  $\mu\tau$  product and surface recombination velocity  $S$ .

$$I = \frac{I_0 \mu \tau V}{L^2} \frac{1 - \exp\left(-\frac{L^2}{\mu \tau V}\right)}{1 + \frac{L S}{V \mu}} \quad (12)$$

Where,  $I_0$  is the saturated photocurrent,  $\mu$  is the carrier mobility,  $\tau$  is the carrier lifetime,  $V$  is the applied bias, and  $L$  is the thickness of the device. The fitting curves and results were shown in Figure S2 and Table S1, respectively.

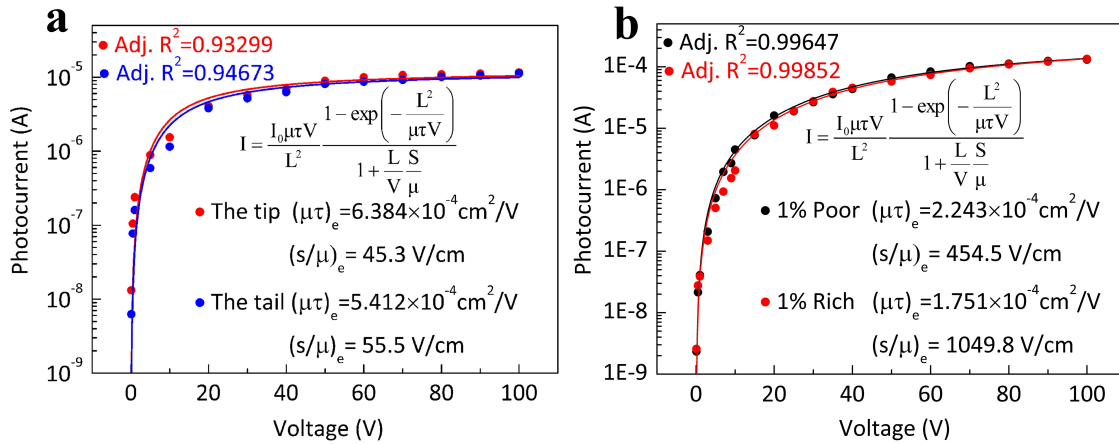

**Figure S2.** Bias-dependent photocurrent of two samples from (a) the tip and the tail part of a same ingot, (b) tip part of a 1% Pb-rich and a 1% Pb-poor crystal

**Table S1** The fitting results in **Figure S2**

| Sample                         | Tip region             | Tail region            | 1% Pb-poor crystal     | 1% Pb-rich crystal     |
|--------------------------------|------------------------|------------------------|------------------------|------------------------|
| Thick (mm)                     | 1.216                  | 1.205                  | 1.577                  | 1.266                  |
| $\mu\tau$ (cm <sup>2</sup> /V) | $6.384 \times 10^{-4}$ | $5.412 \times 10^{-4}$ | $2.243 \times 10^{-4}$ | $1.751 \times 10^{-4}$ |
| $s/\mu$ (V/cm)                 | 45.3                   | 55.5                   | 454.5                  | 1049.8                 |

## Section 4. Defect-related fitting parameters of TSC spectra

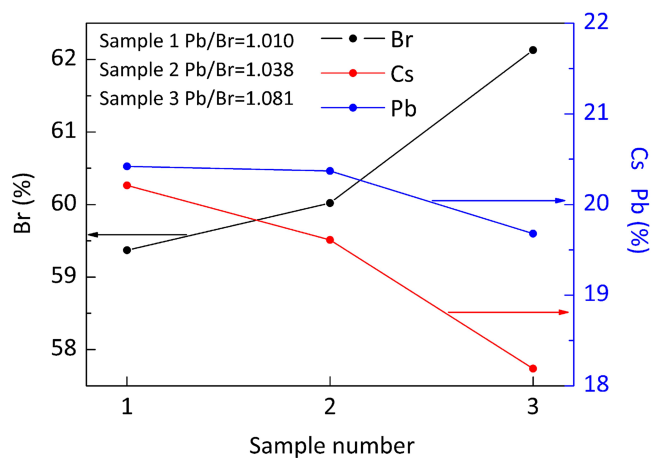

**Figure S3.** Elemental ratio of wafer as a function of regions of a same crystal

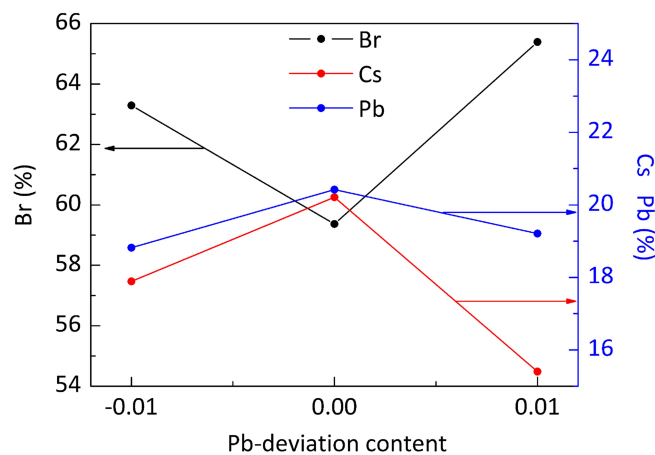

**Figure S4.** Elemental ratio in CsPbBr<sub>3</sub> crystals as a function of stoichiometric condition (1% Pb-poor, stoichiometric and 1% Pb-rich)

**Table S2.** Structure parameters of [PbBr<sub>6</sub>] octahedra in three structures

| Parameter    | Bond distance (Å)      |                        |                        | Bond angle (°)            |                           |                           | Volume<br>V (Å <sup>3</sup> ) |
|--------------|------------------------|------------------------|------------------------|---------------------------|---------------------------|---------------------------|-------------------------------|
|              | (Pb-Br) <sub>//a</sub> | (Pb-Br) <sub>//b</sub> | (Pb-Br) <sub>//c</sub> | (Br-Pb-Br) <sub>//α</sub> | (Br-Pb-Br) <sub>//β</sub> | (Br-Pb-Br) <sub>//γ</sub> |                               |
| Orthorhombic | 2.955(8)               | 2.984(8)               | 2.964(2)               | 90.8(2)                   | 90.2(2)                   | 89.67(14)                 | 34.84 (3%↑)                   |
| Tetragonal   | 2.930(2)               | 2.930(2)               | 2.723(4)               | 91.3833(0)                | 91.3833(0)                | 89.9666(0)                | 31.15 (8%↓)                   |
| Cubic        | 2.9370(10)             | 2.9370(10)             | 2.9370(10)             | 90(0)                     | 90(0)                     | 90(0)                     | 33.78 (Std.)                  |

**Table S3.** Defect-related parameters based on the best fit of a typical TSC spectrum of a sample from the tip part of a stoichiometric CsPbBr<sub>3</sub> ingot

| Peak level (T) | T <sub>m</sub> / K | E <sub>a</sub> / eV | N <sub>T</sub> / cm <sup>-3</sup> | σ <sub>n</sub> / cm <sup>2</sup> | Possible defect                |
|----------------|--------------------|---------------------|-----------------------------------|----------------------------------|--------------------------------|
| P <sub>1</sub> | 22.2               | 0.02821             | 6.34×10 <sup>12</sup>             | 1.03×10 <sup>-14</sup>           | Cs <sub>i</sub> <sup>1+</sup>  |
| P <sub>2</sub> | 37.5               | 0.05428             | 1.53×10 <sup>13</sup>             | 1.61×10 <sup>-14</sup>           | Pb <sub>Br</sub> <sup>1+</sup> |
| P <sub>3</sub> | P <sub>3-1</sub>   | 50.6                | 1.48×10 <sup>13</sup>             | 1.17×10 <sup>-14</sup>           | V <sub>Br</sub> <sup>1+</sup>  |
|                | P <sub>3-2</sub>   | 59.3                | 5.83×10 <sup>13</sup>             | 1.58×10 <sup>-15</sup>           |                                |
|                | P <sub>3-3</sub>   | 71.3                | 1.11×10 <sup>14</sup>             | 4.76×10 <sup>-16</sup>           |                                |
| P <sub>4</sub> | P <sub>4-1</sub>   | 87.3                | 1.07×10 <sup>14</sup>             | 1.59×10 <sup>-16</sup>           | V <sub>Cs</sub> <sup>1-</sup>  |
|                | P <sub>4-2</sub>   | 96.8                | 1.28×10 <sup>13</sup>             | 2.35×10 <sup>-15</sup>           |                                |
| P <sub>5</sub> | 117.1              | 0.21540             | 3.92×10 <sup>13</sup>             | 2.02×10 <sup>-17</sup>           | Pb <sub>i</sub> <sup>1+</sup>  |
| P <sub>6</sub> | 158.2              | 0.30762             | 7.70×10 <sup>12</sup>             | 1.33×10 <sup>-16</sup>           | Pb <sub>i</sub> <sup>2+</sup>  |
| P <sub>7</sub> | 232.1              | 0.48175             | 1.12×10 <sup>13</sup>             | 1.84×10 <sup>-17</sup>           | Pb <sub>Br</sub> <sup>2+</sup> |
| Total          |                    |                     | 3.84×10 <sup>14</sup>             |                                  |                                |

Trap P<sub>1</sub>, with an activation energy of 0.02821 eV, is identified as Cs<sub>i</sub><sup>+</sup>. Trap P<sub>2</sub>, with an activation energy of 0.05428 eV, is identified as Pb<sub>Br</sub><sup>1+</sup> or Br<sub>i</sub><sup>1-</sup>, but the possibility of Br<sub>i</sub><sup>1-</sup> is relatively small in the melt-grown crystal because of the high Br vapor pressure <sup>4</sup>. Trap P<sub>3</sub> (for SIMPA best fitting P<sub>3-1</sub>, P<sub>3-2</sub> and P<sub>3-3</sub> with similar activation energies of 0.0781eV, 0.09513eV and 0.11911eV, respectively) is identified as V<sub>Br</sub><sup>1+</sup> or Br<sub>Cs</sub><sup>1-</sup> defect. However, the Br<sub>Cs</sub><sup>1-</sup> defect is hard to form (the lack of Br<sub>i</sub><sup>1-</sup>). Trap P<sub>4</sub> (for SIMPA best fitting P<sub>4-1</sub> and P<sub>4-2</sub> with similar activation energies of 0.15178eV and 0.17183eV, respectively) is identified as V<sub>Cs</sub><sup>1-</sup>. Trap P<sub>5</sub>, with an activation energy of 0.21540 eV, is identified as Pb<sub>i</sub><sup>1+</sup>. Trap P<sub>6</sub>, with an activation energy of 0.30762 eV, is identified as Pb<sub>i</sub><sup>2+</sup>. And Trap P<sub>7</sub>, with an activation energy of 0.48175 eV, is identified as Pb<sub>Br</sub><sup>2+</sup>.

**Table S4.** Defect-related parameters based on the best fit of a TSC spectrum of a sample from the middle part of a stoichiometric CsPbBr<sub>3</sub> ingot

| Peak level (T) | T <sub>m</sub> / K | E <sub>a</sub> / eV | N <sub>T</sub> / cm <sup>-3</sup> |                       | σ <sub>n</sub> / cm <sup>2</sup> | Possible defect                |
|----------------|--------------------|---------------------|-----------------------------------|-----------------------|----------------------------------|--------------------------------|
| P <sub>1</sub> | 19.22              | 0.02341             | 1.34×10 <sup>12</sup>             |                       | 8.41×10 <sup>-15</sup>           | Cs <sub>i</sub> <sup>1+</sup>  |
| P <sub>2</sub> | P <sub>2-1</sub>   | 32.95               | 4.10×10 <sup>11</sup>             | 7.49×10 <sup>11</sup> | 1.11×10 <sup>-14</sup>           | Pb <sub>Br</sub> <sup>1+</sup> |
|                | P <sub>2-2</sub>   | 38.13               | 3.39×10 <sup>11</sup>             |                       | 2.93×10 <sup>-14</sup>           |                                |
| P <sub>3</sub> | P <sub>3-1</sub>   | 76.48               | 2.35×10 <sup>13</sup>             | 3.89×10 <sup>13</sup> | 4.76×10 <sup>-15</sup>           | V <sub>Cs</sub> <sup>1-</sup>  |
|                | P <sub>3-2</sub>   | 80.83               | 1.53×10 <sup>13</sup>             |                       | 2.06×10 <sup>-15</sup>           |                                |
| P <sub>4</sub> | 117.5              | 0.21635             | 1.35×10 <sup>11</sup>             |                       | 6.88×10 <sup>-16</sup>           | Pb <sub>i</sub> <sup>1+</sup>  |
| P <sub>5</sub> | P <sub>5-1</sub>   | 250                 | 2.22×10 <sup>14</sup>             |                       | 5.02×10 <sup>-17</sup>           | Pb <sub>Br</sub> <sup>2+</sup> |
|                | P <sub>5-2</sub>   | 250                 | 5.89×10 <sup>13</sup>             | 3.71×10 <sup>14</sup> | 3.13×10 <sup>-16</sup>           |                                |
|                | P <sub>5-3</sub>   | 250                 | 9.01×10 <sup>13</sup>             |                       | 6.18×10 <sup>-18</sup>           |                                |
| Total          |                    |                     | 4.12×10 <sup>14</sup>             |                       |                                  |                                |

**Table S5.** Defect-related parameters based on the best fit of a TSC spectrum of a sample from the tail part of a stoichiometric CsPbBr<sub>3</sub> ingot

| Peak level (T) | T <sub>m</sub> / K | E <sub>a</sub> / eV | N <sub>T</sub> / cm <sup>-3</sup>           |                                             | σ <sub>n</sub> / cm <sup>2</sup> | Possible defect                |
|----------------|--------------------|---------------------|---------------------------------------------|---------------------------------------------|----------------------------------|--------------------------------|
| P <sub>1</sub> | 98.27              | 0.17491             | 1.34×10 <sup>13</sup>                       |                                             | 2.17×10 <sup>-16</sup>           | V <sub>Cs</sub> <sup>1-</sup>  |
| P <sub>2</sub> | P <sub>2-1</sub>   | 144.8               | 3.71×10 <sup>14</sup>                       |                                             | 5.09×10 <sup>-16</sup>           | Pb <sub>i</sub> <sup>1+</sup>  |
|                | P <sub>2-2</sub>   | 153.5               | 0.29688                                     | 1.38×10 <sup>14</sup> 1.27×10 <sup>15</sup> | 6.64×10 <sup>-16</sup>           |                                |
|                | P <sub>2-3</sub>   | 153.5               | 0.29688                                     | 7.57×10 <sup>14</sup>                       | 4.36×10 <sup>-17</sup>           |                                |
|                | P <sub>3</sub>     | 197.0               | 0.39792                                     | 6.68×10 <sup>13</sup>                       |                                  |                                |
| P <sub>4</sub> | 225.6              | 0.46616             | 7.51×10 <sup>13</sup>                       |                                             | 2.78×10 <sup>-17</sup>           | Pb <sub>Br</sub> <sup>2+</sup> |
| P <sub>5</sub> | P <sub>5-1</sub>   | 262.9               | 3.59×10 <sup>14</sup>                       |                                             | 2.33×10 <sup>-17</sup>           | Pb <sub>Br</sub> <sup>3+</sup> |
|                | P <sub>5-2</sub>   | 278.0               | 3.04×10 <sup>14</sup> 9.30×10 <sup>14</sup> |                                             | 5.54×10 <sup>-17</sup>           |                                |
|                | P <sub>5-3</sub>   | 286.6               | 0.61587                                     | 1.87×10 <sup>14</sup>                       | 1.30×10 <sup>-16</sup>           |                                |
|                | P <sub>5-4</sub>   | 292.4               | 0.63042                                     | 7.99×10 <sup>13</sup>                       | 3.04×10 <sup>-16</sup>           |                                |
|                | Total              |                     |                                             | 2.35×10 <sup>15</sup>                       |                                  |                                |

**Table S6.** Defect-related parameters based on the best fit of a TSC spectrum of a sample from the tip part of a  
1% Pb-poor CsPbBr<sub>3</sub> ingot

| Peak level (T) | T <sub>m</sub> / K | E <sub>a</sub> / eV | N <sub>T</sub> / cm <sup>-3</sup> | σ <sub>n</sub> / cm <sup>2</sup> | Possible defect                                                 |
|----------------|--------------------|---------------------|-----------------------------------|----------------------------------|-----------------------------------------------------------------|
| P <sub>1</sub> | 22.47              | 0.02857             | 5.65×10 <sup>13</sup>             | 3.09×10 <sup>-15</sup>           | CSi <sup>1+</sup>                                               |
| P <sub>2</sub> | P <sub>2-1</sub>   | 43.07               | 2.66×10 <sup>13</sup>             | 4.41×10 <sup>13</sup>            | V <sub>Br</sub> <sup>1+</sup>                                   |
|                | P <sub>2-2</sub>   | 55.83               | 1.75×10 <sup>13</sup>             |                                  |                                                                 |
|                | P <sub>3</sub>     | 80.86               | 9.45×10 <sup>13</sup>             | 2.45×10 <sup>-16</sup>           | V <sub>Pb</sub> <sup>2-</sup> or CS <sub>Pb</sub> <sup>1-</sup> |
| P <sub>4</sub> | 118.7              | 0.21901             | 7.71×10 <sup>13</sup>             | 1.84×10 <sup>-16</sup>           | Pb <sub>i</sub> <sup>1+</sup>                                   |
| P <sub>5</sub> | P <sub>5-1</sub>   | 137.0               | 6.11×10 <sup>13</sup>             | 5.02×10 <sup>-16</sup>           | Pb <sub>i</sub> <sup>2+</sup>                                   |
|                | P <sub>5-2</sub>   | 150.2               | 1.24×10 <sup>14</sup>             | 3.97×10 <sup>-16</sup>           |                                                                 |
|                | P <sub>5-3</sub>   | 162.2               | 1.82×10 <sup>14</sup>             | 5.80×10 <sup>-16</sup>           |                                                                 |
|                | P <sub>5-4</sub>   | 175.7               | 1.20×10 <sup>13</sup>             | 3.07×10 <sup>-16</sup>           |                                                                 |
| P <sub>6</sub> | 196.3              | 0.39620             | 2.08×10 <sup>13</sup>             | 4.56×10 <sup>-17</sup>           | Pb <sub>Br</sub> <sup>2+</sup>                                  |
| P <sub>7</sub> | P <sub>7-1</sub>   | 241.3               | 6.91×10 <sup>13</sup>             | 3.64×10 <sup>-17</sup>           | Pb <sub>Br</sub> <sup>3+</sup>                                  |
|                | P <sub>7-2</sub>   | 247.3               | 7.63×10 <sup>13</sup>             | 7.01×10 <sup>-18</sup>           |                                                                 |
| Total          |                    |                     | 8.18×10 <sup>14</sup>             |                                  |                                                                 |

**Table S7.** Defect-related parameters based on the best fit of a TSC spectrum of a sample from the tip part of a  
1% Pb-rich CsPbBr<sub>3</sub> ingot

| Peak level (T) | T <sub>m</sub> / K | E <sub>a</sub> / eV | N <sub>T</sub> / cm <sup>-3</sup> | σ <sub>n</sub> / cm <sup>2</sup> | Possible defect                |
|----------------|--------------------|---------------------|-----------------------------------|----------------------------------|--------------------------------|
| P <sub>1</sub> | 22.90              | 0.02926             | 3.97×10 <sup>16</sup>             | 5.31×10 <sup>-15</sup>           | CSi <sup>1+</sup>              |
| P <sub>2</sub> | 38.26              | 0.05565             | 7.76×10 <sup>16</sup>             | 4.93×10 <sup>-16</sup>           | Pb <sub>Br</sub> <sup>1+</sup> |
| P <sub>3</sub> | P <sub>3-1</sub>   | 96.86               | 1.57×10 <sup>17</sup>             | 1.69×10 <sup>17</sup>            | V <sub>Cs</sub> <sup>1-</sup>  |
|                | P <sub>3-2</sub>   | 96.86               | 1.19×10 <sup>16</sup>             |                                  |                                |
| P <sub>4</sub> | P <sub>4-1</sub>   | 251.7               | 6.19×10 <sup>17</sup>             | 1.29×10 <sup>18</sup>            | Pb <sub>Br</sub> <sup>2+</sup> |
|                | P <sub>4-2</sub>   | 251.7               | 6.70×10 <sup>17</sup>             |                                  |                                |
| Total          |                    |                     | 1.57×10 <sup>18</sup>             |                                  |                                |

## REFERENCES

- (1) Zhang, M.; Zheng, Z.; Fu, Q.; Chen, Z.; He, J.; Zhang, S.; Yan, L.; Hu, Y.; Luo, W. Growth and characterization of the all-inorganic lead halide perovskite semiconductor CsPbBr<sub>3</sub> single crystals. *CrystEngComm*. **2017**, 19(45), 6797-6803.
- (2) Kang, J.; Wang, L. W. High Defect Tolerance in Lead Halide Perovskite CsPbBr<sub>3</sub>. *J. phys. Chem. Lett.* **2017**, 8(2), 489-493.
- (3) Look, D. C. Chapter 2 The Electrical and Photoelectronic Properties of Semi-Insulating GaAs, *Semiconduct. Semimet.* **1983**, 19, 75-170.
- (4) Mansour, A. E.; Dey, S.; Amassian, A.; Tanielian, M. H. Bromination of graphene: a new route to making high performance transparent conducting electrodes with low optical losses. *ACS Appl. Mater. Inter.* **2015**, 7(32), 17692-17699.
